# Supplementary material for: A Health Guidance App to Improve Motivation, Adherence to Lifestyle Changes and Indicators of Metabolic Disturbances among Japanese Civil Servants
Source: MDPI journal article supplement (doi:10.3390/ijerph17218147), 2020-11-04
Supplement: s1 [file s1]

**Supplemental Table S1.** Diagnostic criteria for metabolic syndrome in Japan.

| No. | Risk factor           | Cut-off points |
|-----|-----------------------|----------------|
| 1   | Waist circumference   |                |
|     | Male                  | ≥ 85 cm        |
|     | Female                | ≥ 90 cm        |
| 2   | Triglyceride          | ≥ 150 mg/dl    |
|     | or                    |                |
|     | HDL-cholesterol       | < 40 mg/dl     |
| 3   | Blood pressure        |                |
|     | Systolic BP           | ≥ 130 mmHg     |
|     | or/and                |                |
|     | Diastolic BP          | ≥ 85 mmHg      |
| 4   | Fasting Blood Glucose | ≥ 110mg/dl     |

Note: The Metabolic Syndrome Diagnostic Criteria Review Committee of Japan defines metabolic syndrome as 1 is required, having two or more of 2 to 4; HDL: High-density lipoprotein; BP: Blood pressure.

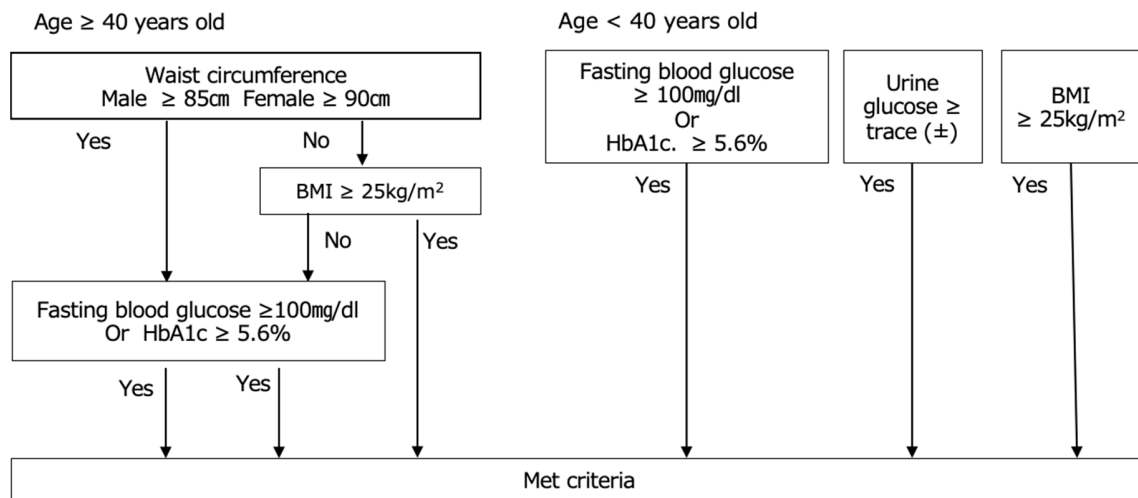

**Supplemental Figure S1.** Inclusion criteria for participants.

Note: BMI: Body mass index; HbA1c: Glycated hemoglobin.
